# **The association of child marriage with morbidity, mortality, and low birth weight among children under 5 years in Afghanistan: Findings from a nationally representative survey**

## **Authors**

Omid Dadras<sup>1,2</sup>, Mohammad Yasin Dadras<sup>3</sup>, Leila Jafari<sup>4</sup>, Takeo Nakayama<sup>5</sup>, Fateme Dadras<sup>6</sup>

## **Affiliations**

<sup>1</sup> Department of Community Public Health, School of Public Health, Walailak University, Thailand

<sup>2</sup> Excellent Center for Dengue and Community Public Health (EC for DACH), Walailak University, Thailand

<sup>3</sup> Department of Pre-hospital Emergency Care, School of Nursing, Zahedan University of Medical Sciences, Iran

<sup>4</sup> Department of Public Health and Nursing, School of Medicine and Health Sciences, Norwegian University of Science and Technology, Norway.

<sup>5</sup> Department of Health Informatics, School of Public Health, Kyoto University, Japan.

<sup>6</sup> Department of Gynecology and Obstetrics, Graduate School of Medicine, Tehran University of Medical Sciences, Iran

**Corresponding author:** Omid Dadras, Department of Community Public Health, School of Public Health, Walailak University, Thailand. Excellent Center for Dengue and Community Public Health (EC for DACH), Walailak University, Thailand.

Tel: +4796685315

Email: [omiddadras@yahoo.com](mailto:omiddadras@yahoo.com)

## **Abstract**

**Objectives:** This study aimed to assess the impact that child marriage could have on the morbidity and mortality of children under 5 years, among a nationally representative sample of births to women aged 15-25 years in Afghanistan.

**Methods:** A secondary analysis of data from the 2015 Afghanistan Demographic and Health Survey (DHS), including the births in the past 5 years to the ever-married women aged 15-24 years old. Bivariate and multivariate analyses were employed to examine the association of child marriage (<18y) with morbidity (diarrhea, acute respiratory infection, and fever in the last 2 weeks), mortality (neonatal, infant, child), low birth weight (<2500g), and size at birth among the births to women aged 15-24 years, adjusting for the effect of sociodemographic and structural inequalities.

**Results:** Approximately two-thirds of births in the past 5 years were born to mothers aged <18 years. The majority of them were residing in rural areas (75.67%) and were born to illiterate mothers (51.68%) from poor families (39.39%). There was only a significant association between child marriage (<18) with neonatal mortality for births to the women married at ages <18 years (crude OR = 2.30, 95% CI: 1.52-3.49 & adjusted OR = 1.94, 95% CI: 1.25-3.01) and infant mortality for births to the women married at ages ≤14y (crude OR = 1.94, 95% CI: 1.06-3.53). However, it disappeared for neonatal mortality after adjustment for antenatal care visits and infant mortality after adjustment for sociodemographic inequalities.

**Conclusion:** Although the births to women married as a child were more likely to die at an early age, this association disappeared after adjustment for the number of ANC visits. Given the inadequate ANC in child brides in Afghanistan is mainly due to a lack of autonomy and inability in decision-making to negotiate their reproductive, strong global advocacy is required to empower the young Afghan women by reducing the existent social and gender-based inequalities and reduce the consequent adverse health outcomes in both child mothers and offspring.

**Keywords:** Children under 5, mortality, morbidity, low birth weight, child marriage, Afghanistan

## Introduction

Child marriage is described as marriage before the age of 18 years and is a major social problem, mainly in low- and middle-income countries, and is associated with several adverse health outcomes in young women (de Groot et al., 2018). Moreover, it is also a violation of human rights and a serious public health issue (Nour, 2009). Although there has been a great improvement in child marriage around the world, this harmful practice remained prevalent in some regions around the world, particularly in Sub-Saharan Africa (38%), followed by South Asia (30%) and Latin America (25%) (UNICEF, 2020). Additionally, in Asian Muslim countries due to the influence of strict Islamic culture, such practices are more common; for example in 2018, more than a third of women were married before age of 18 years in Pakistan (Javed & Mughal, 2021) and Afghanistan (Afghanistan, 2018). The Afghan Civil Law allows marriage at ages  $\geq 16$  years for girls and  $\geq 18$  years for boys; however, in Afghan culture, younger marriage even at very early ages is accepted especially for the girls. Moreover, the widespread poverty in Afghanistan encourages poor families to force their young girls into a marriage at very early ages in hope of a better life and receiving large doweries from future husbands (Dadras et al., 2022). Child marriage is also a common practice for settling debts and making peace with rivals in Afghan society (UNFPA). That being said, child marriage has been a barrier to the gender equality efforts and achievement of sustainable development goals targeted specifically goals 1 to 5: The eradication of poverty, the achievement of universal education, women empowerment, reducing child mortality, and improvement of maternal health (Amin et al., 2017).

Marriage at early ages (<18 years) has been linked to several adverse maternal and child outcomes. It has been shown that adolescent brides (10-17 years old) are at a higher risk for unintended and high-risk pregnancy, sexually transmitted diseases, and obstetric fistula (Raj & Boehmer, 2013; Raj et al., 2010; Santhya, 2011). Moreover, there are more likely to suffer from intimate partner violence and subsequent depression and this could further harm the maternal and child health (Dadras et al., 2022). A variety of sociocultural factors such as lack of education, limited access to media, insufficient health literacy, and man-dominant norms have been described as potential drivers for these trends (Kidman, 2016; Kohno et al., 2019; Kohno, Techasrivichien, et al., 2020). In addition, a lack of autonomy in decision-making and

negotiating reproductive rights could lead to the inability to actively engage in health promotion programs and adequately receive the necessary health care during pregnancy which could lead to adverse outcomes (Aychiluhm et al., 2021; Clark et al., 2006; Kohno, Dahlui, et al., 2020).

Women empowering and social engagement of young adolescent girls could increase their access to maternity care and enhance reproductive and child health and improve the socio-economic development in low- and middle-income countries (LMICs) (ICRW, 2007; Mathur et al., 2003). Nevertheless, it has been shown that maternity and reproductive health programs lack the necessities to address these obstacles and are; moreover, hard to reach these vulnerable populations in LMICs (Mathur et al., 2003; Nour, 2009) and this could not only endanger the mother's health but also the child's health. Early marriage has been linked to low birth weight and higher child and infant morbidity and mortality in some LMICs (Abdullah et al., 2007; International Council for Research on Women (ICRW); United Nations Children's Fund (UNICEF), 2005). However, the results are inconsistent across countries and more epidemiological data is required to formulate well-tailored intervention targeting the child brides to ensure the health of both child mothers and offspring.

Despite the potential adverse impact that early marriage could have on child health, there is still a gap in knowledge of true associations between age at marriage and mortality and morbidity among children in some of the most afflicted countries such as Afghanistan. To our knowledge, this is the first study to explore the impact that child marriage could have on the morbidity and mortality of children, taking into account the effect of social and structural inequalities, among a nationally representative sample of children under 5-year in Afghanistan. The results could inform and guide future policies and interventions to enhance the health of Afghan child brides and their offspring.

## **Methods**

### **Study design**

This cross-sectional study analyzed the data for children under 5 years from the Afghanistan Demographic and Health Survey (ADHS) carried out in 2015. ADHS is a nationally representative survey implemented

by the Central Statistics Organization (CSO) in collaboration with the Afghanistan Ministry of Public Health (MoPH) and funded by the United States Agency for International Development (USAID).

### **Study population and sampling**

ADHS 2015 collected data for women aged 15-49 years and their children aged less than 5 years old. A stratified two-stage cluster sampling was employed to estimate the key indicators at the national level, in urban and rural areas, and for each of the 34 provinces of Afghanistan; in which, 950 clusters—enumeration areas from the previous national census—including 260 and 690 in urban and rural areas and 690 were selected, respectively. In the second stage, through an equal probability systematic selection process, 25,650 households were selected. Sampling weights were calculated and applied to obtain a representative estimate at the national level. All the women aged 15-49 years (n=29641) who were either permanent residents of the selected households or visitors who stayed in the households the night before the survey were recruited after informed consent. The women were interviewed about all births in the past 5 years (n = 31063), the sample from which data were derived in the present study. Our analyses were restricted to the births of the young women aged 15-24 to ensure the inclusion of all the births in the last 5 years to the mothers that married at early ages (<18). Including the births to this maternal age group not only enhances the comparability of the results across similar studies but also reduces the chance of recall bias which may occur as the women move to the older age groups (Kenny et al., 2019). Moreover, we could obtain estimates that reflect relatively recent marriages rather than marriages that occurred decades ago.

### **Measurement and scales**

A standard DHS questionnaire collected the data related to the demographic and health of all eligible women and their children under 5-year including women's demographic characteristics, household information, family planning, fertility preferences, child health, sexually transmitted diseases, marriage, sexual behavior, and domestic violence (Dadras. O & Chapman. RS, 2017). However, for the current study, our primary interest was questions related to child marriage and morbidity and mortality indicators of children under 5 years.

### **Independent variables**

The main explanatory variable was maternal age at first marriage. Child marriage was defined as marriage at ages less than 18 years for the first time. The mother's age was further categorized into three groups based on the age at the first marriage:  $\geq 18$  years (marriage as an adult), 15-17 years (marriage in middle adolescence), and  $\leq 14$  years of age (marriage in early adolescence or childhood) to capture the potential vulnerability that may exist for the birth to the mothers married in very early ages.

### **Outcomes of interest**

In total, eight indicators concerning the morbidity and mortality of children under 5-year were estimated and their relationship with maternal age at marriage was examined. These included:

#### ***Morbidity indicators:***

- ***Diarrhea in the past 2 weeks:*** This was assessed by a question if the child had diarrhea within the last two weeks.
- ***Acute respiratory infection in the past 2 weeks:*** This was assessed by two questions (ie, whether the child had suffered from a cough and rapid breathing in the last two weeks).
- ***Fever in the past two weeks:*** This was assessed by questions about whether the child had fever in the last two weeks.
- ***Very small or small size at birth:*** This was reported by the mother as the size of the child at birth, was dichotomized into “very small or smaller than average” and “average or larger”.
- ***Low birth weight:*** This was obtained from the infant's medical record or maternal recall and was defined as birth weight  $< 2500$  g. Due to the large proportion of birth at home (46.27%) and lack of reliable records, there were 7928 missing cases out of 9200 live birth; however, including the size at birth increased the validity of estimation even though both variables were not completely flawless.

#### ***Mortality indicators***

- ***Child mortality:*** This was defined as the death of the child before the age of 5 years (0-59 months).
- ***Infant mortality:*** This was defined as death within the first year of life.

- **Neonatal mortality:** This was defined as death within the first month of life.

### **Covariates**

Covariates included the sociodemographic characteristics of births to young women aged 15-24 years consisting of maternal and child factors. Maternal demographic included the age (continuous in years), education (no education, primary, secondary or higher), place of residence (rural, urban), wealth index (poor, middle, rich), ethnicity (Pashtun, Tajik, Hazara, Uzbek, Turkman, Nuristani, Baloch, Pashai, other), maternal age at birth (<18, 18-20, >20), and the number of antenatal care (ANC) visits (< 4 times,  $\geq 4$ ). Child-specific demographics included age (continuous in years), sex (male, female), and being born to a multiparous birth (yes, no).

### **Statistical Analysis**

All the analyses were restricted to the live births of ever-married women aged 15-24 years in the last 5 years. The descriptive statistics described the maternal and child demographics and compared them across the categories of maternal age at marriage (<18 years vs  $\geq 18$  years) using the Chi-square test (categorical variables) and t-student test (continuous variables) (Table 1). Binary logistic regression analysis was employed to estimate the odds of the child morbidity and mortality indices across the categories of maternal age at marriage (<18 years vs  $\geq 18$  years); before and after adjustment for maternal and child's sociodemographic factors (Table 2). Adjusted models for diarrhea, ARI, and fever outcomes included only the living children under 5-year and accounted for the age of child, sex of child, multiparous births, maternal age, maternal education, place of residence, and wealth index. Adjusted models for child mortality indices, birth size, and low birth weight outcomes included all the births in the past 5 years and accounted for sex of child, multiparous births, maternal age, maternal education, place of residence, and wealth index. In addition to the mentioned covariates, a separate model was built to account for the impact of antenatal visits to examine the effect of age at marriage on child morbidity and mortality indices beyond the attributable influence of sociodemographic inequalities, including the inadequate number of antenatal visits during pregnancy. Given the current evidence indicating lower age at marriage could increase the risk of the maternal and child morbidity and mortality (Gortzak-Uzan et al., 2001; Olausson et al., 1999), additional

models were constructed to compare the child morbidity and mortality indices across different categories of maternal age at marriage ( $\leq 14$  years, 15-17,  $\geq 18$ ). Results were presented as odds ratio (OR) and adjusted odds ratio (AOR) with 95% confidence intervals (95% CI). All the analyses were performed using STATA version 14 and sampling weight and design were defined and accounted for using the STATA command “svy” in all analyses. A 2-tailed P value  $< .05$  was considered to be statistically significant.

### **Ethical consideration**

The data used in this study could be accessed upon a reasonable request from the DHS website and are publicly available. The ethical necessities for data collection were sought and assured by the institutions that commissioned, funded, or managed the surveys. All DHS are reviewed and approved by ICF International and Institutional Review Board of Ministry of Health in the target country to ensure that the protocols comply with the U.S. Department of Health and Human Services regulations for the protection of human subjects. Therefore, this study did not require further ethical approval.

### **Results**

#### *1. Sociodemographic of the births in the past 5 years to the ever-married women aged 15-24 years in Afghanistan DHS 2015*

A total of 9200 live births in the past 5 years to the ever-married women aged 15-24 years old were included in the final analysis; of whom, 6151 (67.74%) were the births to women married as a child ( $< 18$  years) and 3049 (32.26%) were the births to women married as an adult ( $\geq 18$  years). The mean age of the children was significantly higher among the births to women married as a child ( $1.66 \text{ yrs} \pm 0.02$  in child marriage vs  $1.84 \text{ yrs} \pm 0.04$  in adult marriage group;  $p < 0.001$ ). Likewise, as is shown in Table 1, the children were proportionally older among the births to the women married as a child as compared to those of women married as an adult marriage. More than half the births were male in both child and adult marriage groups. The place of residence was not significantly different between the births of women married as a child compared to counterparts and in both groups only a quarter of children were residing in urban areas (Table 1). Approximately two-thirds of women had no education; however, the rate of illiteracy was significantly higher among the women married at ages  $< 18$  compared to those married at older ages (74.06% vs 70.55%,

p<0.001). Similarly, the rate of illiteracy was higher among the fathers in the child marriage group in comparison with those in the adult marriage group (53.33% vs 47.73%); though not significant (p=0.076). The majority of the children under 5-year were from Pashtun and Tajik ethnic groups (43.56% and 33.74%, respectively). In terms of the wealth index, there were no significant differences between births to women of either group (child vs adult marriage) and almost equal proportions of poor and rich in both groups. The child marriage group was more likely to receive adequate antenatal care visits ( $\geq 4$ ) during pregnancy (Table 1). The mean age of the mother was 21.23 yrs  $\pm$  0.02 in the child marriage group; which was significantly lower than the adult marriage group (22.52 yrs  $\pm$  0.02, p<0.001); similarly, as Table 1 shows, the majority of the births to women married at ages <18 occurred at younger ages (64.93% of mothers were <18 yrs old or younger at the time of birth) as compared to the births to women married at ages  $\geq 18$  (64.99% mothers were 18-20 yrs old at the time of birth). Overall, 4.5% (423) of children died before the age of 5 years with the majority among the births to the women married at ages <18 (319 vs 104, p<0.001).

**Table 1.** Demographics of births in the past 5 years to ever-married women aged 15-24 years in Afghanistan, by maternal age at marriage

|                          | Total births | Age at marriage<br><18 years | Age at marriage<br>$\geq 18$ years | p-value |
|--------------------------|--------------|------------------------------|------------------------------------|---------|
|                          | N (%)        | N (%)                        | N (%)                              |         |
| Child mean age (SD)      | 1.66 (0.02)  | 1.84 (0.02)                  | 1.28 (0.04)                        | <.001   |
| Current age of child (y) |              |                              |                                    |         |
| <1                       | 2337 (25.27) | 1291 (20.98)                 | 1046 (34.46)                       | <.001   |
| 1-1.9                    | 1988 (21.59) | 1246 (20.35)                 | 742 (24.27)                        |         |
| 2-2.9                    | 1915 (20.24) | 1313 (20.53)                 | 602 (19.62)                        |         |
| 3-3.9                    | 1496 (17.01) | 1106 (18.76)                 | 390 (13.27)                        |         |
| 4-4.9                    | 1041 (11.38) | 876 (14.27)                  | 165 (5.19)                         |         |
| Deceased                 | 423 (4.5)    | 319 (5.12)                   | 104 (3.19)                         |         |
| Sex of child             |              |                              |                                    |         |
| Male                     | 4928 (53.34) | 3263 (53.38)                 | 1665 (53.26)                       | 0.965   |
| Female                   | 4272 (46.66) | 2888 (46.62)                 | 1384 (46.74)                       |         |
| Place of residence       |              |                              |                                    |         |
| Urban                    | 2254 (24.33) | 1498 (24.11)                 | 756 (24.80)                        | 0.833   |
| Rural                    | 6946 (75.67) | 4653 (75.89)                 | 2293 (75.20)                       |         |
| Maternal education       |              |                              |                                    |         |
| No education             | 7076 (72.94) | 4755 (74.06)                 | 2321 (70.55)                       | <.001   |
| Primary                  | 907 (11.82)  | 663 (12.72)                  | 244 (9.89)                         |         |
| Secondary or higher      | 1217 (15.24) | 733 (13.22)                  | 484 (19.56)                        |         |
| Father's education       |              |                              |                                    |         |
| No education             | 4562 (51.68) | 3135 (53.53)                 | 1427 (47.73)                       | .076    |
| Primary                  | 1261 (14.95) | 842 (13.52)                  | 419 (18.00)                        |         |
| Secondary or higher      | 3273 (33.37) | 2101 (32.95)                 | 1172 (34.27)                       |         |
| Ethnicity                |              |                              |                                    |         |
| Pashtun                  | 4130 (43.56) | 2725 (43.14)                 | 1405 (44.47)                       | .449    |
| Tajik                    | 2754 (33.74) | 1882 (34.79)                 | 872 (31.50)                        |         |
| Hazara                   | 636 (7.14)   | 461 (7.11)                   | 175 (7.20)                         |         |
| Uzbek                    | 533 (9.45)   | 327 (9.40)                   | 206 (9.54)                         |         |

|                               |              |              |              |       |
|-------------------------------|--------------|--------------|--------------|-------|
| Turkmen                       | 98 (1.55)    | 68 (1.38)    | 30 (1.90)    |       |
| Nuristani                     | 586 (.93)    | 352 (0.76)   | 234 (1.29)   |       |
| Baloch                        | 144 (.69)    | 118 (0.82)   | 26 (0.40)    |       |
| Pashai                        | 173 (.95)    | 116 (0.82)   | 57 (1.22)    |       |
| Other                         | 125 (2.00)   | 83 (1.78)    | 42 (2.47)    |       |
| Wealth index                  |              |              |              |       |
| Poor                          | 3775 (39.39) | 2642 (40.86) | 1133 (36.24) | .294  |
| Middle                        | 1936 (19.94) | 1184 (19.51) | 752(20.86)   |       |
| Rich                          | 3489 (40.68) | 2325 (39.64) | 1164 (42.90) |       |
| Received antenatal care       |              |              |              |       |
| Yes                           | 3344 (63.48) | 1587 (39.46) | 766 (31.06)  | <.001 |
| No                            | 2353 (36.52) | 2028 (60.54) | 1316 (68.94) |       |
| Mother's mean age (SD)        | 21.66 (0.02) | 21.23 (0.02) | 22.52 (0.02) | <.001 |
| Mother's age at birth (years) |              |              |              |       |
| <18                           | 3989 (44.66) | 3961 (64.93) | 28 (1.26)    | <.001 |
| 18-20                         | 4153 (44.24) | 2153 (34.56) | 2000 (64.99) |       |
| >20                           | 1058 (11.09) | 37 (.51)     | 1021 (33.75) |       |
| Total                         | 9200 (100)   | 6151 (67.74) | 3049 (32.26) |       |

## 2. The prevalence of morbidity and mortality indices among children under 5-year and their association with maternal age at marriage

The prevalence of diarrhea, acute respiratory infection (ARI), and fever in the last 2 weeks was respectively 29.47%, 23.23%, and 28.98% among the children under 5 years born to the ever married women aged 15-24 years. There were no significant differences between the rate of diarrhea, ARI, and fever in the last 2 weeks between the children born to the women married at ages <18 and those born to the women married at ages  $\geq 18$  (Table 2).

The child (<5 years) infant (<1 year), and neonatal (<1 month) mortality rates of the births in the past 5 years to the ever-married women aged 15-25 years were respectively 4.5% (423), 4.32% (400), 2.34% (244). Except for the neonatal mortality rate (COR = 2.30, 95% CI: 1.52-3.49 and AOR = 1.94, 95% CI: 1.25-3.01), the child and infant mortality rates were not statistically different between the babies born to the women married at ages <18 and those born to women married at ages  $\geq 18$ . However, the difference in neonatal mortality rate became insignificant after adjustment for the number of ANC visits. Furthermore; in the extended age-at-marriage analysis ( $\leq 14$ , 15-17,  $\geq 18$ ), the difference in infant mortality became significant among those married before age 14 compared to those married at older ages (COR = 1.94, 95% CI: 1.06-3.53) in unadjusted model and turned to be insignificant in the adjusted model (Tables 2 and 3).

Approximately a quarter of children under 5 years born to ever-married women aged 15-24 years were described as very small or small in size at the time of birth by their mother. Moreover, an estimated 15% (207/1272) of them had a low birth weight. It appeared that there is no difference in the rate of very small or small size at birth with maternal age at marriage even after adjustment for sociodemographic factors and the number of ANC visits (Tables 2 and 3). In the extended age-at-marriage analysis ( $\leq 14$ , 15-17,  $\geq 18$ ), the babies born to women married at ages  $\leq 14$  were less likely to suffer from low birth weight compared to the

those born to women married at older ages (COR = 0.28, 95% CI: 0.12-0.68 and AOR = 0.31, 95% CI: 0.12-0.77); however, this did not stand after adjustment for the number of ANC visits.

**Table 2.** The association of maternal child marriage with morbidity, mortality, and low birth weight among births in the past 5 years to ever-married women aged 15-24 years in Afghanistan

| Health Indicator                  | Prevalence   |              | Age at marriage        | COR (95 % CI)     | AOR (95% CI) <sup>a</sup> | AOR (95% CI) <sup>b</sup> |
|-----------------------------------|--------------|--------------|------------------------|-------------------|---------------------------|---------------------------|
|                                   | N (%)        | N (%)        | <18 years<br>≥18 years |                   |                           |                           |
| Diarrhea (past 2 wk) <sup>c</sup> |              |              |                        |                   |                           |                           |
| Yes                               | 2310 (29.47) | 1505 (65.71) | 805 (34.29)            | 0.89 (0.74-1.08)  | 0.94 (0.77-1.17)          | 0.96 (0.76-1.21)          |
| No                                | 6316 (70.53) | 4212 (68.22) | 2102 (31.78)           |                   |                           |                           |
| ARI (past 2 wk) <sup>c</sup>      |              |              |                        | 0.81 (0.62-1.05)  | 0.83 (0.64-1.08)          | 0.81 (0.61-1.07)          |
| Yes                               | 1551 (23.23) | 999 (36.06)  | 552 (36.06)            | 0.85 (0.64-1.13)  | 0.91 (0.68-1.24)          | 0.86 (0.61-1.21)          |
| No                                | 7049 (76.77) | 4704 (68.70) | 2345 (31.30)           |                   |                           |                           |
| Fever (past 2 wk) <sup>c</sup>    |              |              |                        |                   |                           |                           |
| Yes                               | 2019 (28.98) | 1321 (65.16) | 698 (34.84)            | 1.64 (0.98-2.72)  | 1.44 (0.90-2.29)          | 1.26 (0.77-2.03)          |
| No                                | 6625 (71.02) | 4422 (68.72) | 2203 (31.28)           |                   |                           |                           |
| Child mortality (<5y)             |              |              |                        |                   |                           |                           |
| Yes                               | 423 (4.50)   | 319 (77.44)  | 104 (22.56)            | 1.59 (0.94-2.68)  | 1.35 (0.84-2.18)          | 1.13 (0.70-1.84)          |
| No                                | 8777 (95.50) | 5832 (67.74) | 2945 (32.26)           |                   |                           |                           |
| Infant mortality (<y)             |              |              |                        |                   |                           |                           |
| Yes                               | 400 (4.32)   | 302 (76.99)  | 98 (23.01)             | 2.30 (1.52-3.49)* | 1.94 (1.25-3.01)*         | 1.22 (0.64-2.32)          |
| No                                | 8800 (95.68) | 5849 (67.77) | 2951 (32.23)           |                   |                           |                           |
| Neonatal mortality (<1 mo)        |              |              |                        |                   |                           |                           |
| Yes                               | 244 (2.64)   | 191 (82.89)  | 53 (17.11)             | 0.97 (0.79-1.19)  | 0.86 (0.70-1.07)          | 0.89 (0.71-1.11)          |
| No                                | 8956 (97.36) | 5960 (67.77) | 2996 (32.23)           |                   |                           |                           |
| Small/very small infant           |              |              |                        |                   |                           |                           |
| Yes                               | 2088 (24.26) | 1402 (67.61) | 686 (32.39)            | 0.59 (0.28-1.25)  | 0.60 (0.31-1.18)          | 0.54 (0.24-1.22)          |
| No                                | 6817 (75.74) | 4547 (68.26) | 2270 (31.74)           |                   |                           |                           |
| Low birth weight (<2500 g)        |              |              |                        |                   |                           |                           |
| Yes                               | 207 (15.07)  | 104 (52.64)  | 103 (47.36)            | 0.59 (0.28-1.25)  | 0.60 (0.31-1.18)          | 0.54 (0.24-1.22)          |
| No                                | 1065 (84.93) | 637 (65.19)  | 428 (34.81)            |                   |                           |                           |

\*P < .001.

<sup>a</sup> The adjusted odds ratio (AOR) for age of child (except for mortality indices), sex of child, multiparous birth, maternal age and education, place of residence, ethnicity, and wealth index.

<sup>b</sup> Adjusted odds ratio (AOR): Additionally adjusted for antenatal care.

<sup>c</sup> Sample restricted to living children under 5 years of age in the past 5 years (n = 8777).

The absolute number of participants does not perfectly correspond to percentages because the percentages are weighted.

All analyses used women married as adults as the reference group.

## Discussion

To the best of our knowledge, this was the first study that assess the prevalence and association of child marriage with morbidity, mortality, and low birth weight among children under 5 years born to the ever-married women aged 15-24 years old in Afghanistan. The results showed that almost two-thirds of women aged 15-24, who gave birth to a child in the past 5 years, married as a child (<18 years). The majority of these women were from socially disadvantaged backgrounds (i.e lower education, living in rural areas, poor families); similar findings were documented in other Asian countries with high rates of child marriages

such as Pakistan (Nasrullah et al., 2014), Bangladesh (Hossain et al., 2022), and India (Raj et al., 2010).

The Pashtun and Tajik were the dominant ethnic groups among the births in the past 5 years to women aged 15-24 years; higher poverty

and illiteracy documented in these ethnic groups could be moderators for marriage at very early ages (Dadras & Nakayama, 2021). Besides, child marriage is common practice in Afghan society and has been a rampant exercise for decades as a measure to strengthen the ties between the rival families and tribes and settle the conflict and debts amongst them. Moreover, girls in poor families are often forced to marry a man, usually much older than them, in hope of a better life in exchange for large dowries (Dadras & Nakayama, 2021; UNFPA).

**Table 3.** The association of maternal age at marriage with morbidity, mortality, and low birth weight among births in the past 5 years to ever-married women aged 15-24 years in Afghanistan, by marital age group

| Health Indicator                  | COR (95 % CI)         | AOR (95%CI) <sup>a</sup> | AOR (95%CI) <sup>b</sup> |
|-----------------------------------|-----------------------|--------------------------|--------------------------|
| Diarrhea (past 2 wk) <sup>c</sup> |                       |                          |                          |
| ≤14                               | 0.91 (0.74-1.11)      | 0.95 (0.73-1.25)         | 0.96 (0.70-1.31)         |
| 15-17                             | 0.85 (0.67-1.09)      | 0.94 (0.76-1.17)         | 0.95 (0.74-1.21)         |
| 18≥                               | Reference             | Reference                | Reference                |
| ARI (past 2 wk) <sup>c</sup>      |                       |                          |                          |
| ≤14                               | 0.74 (0.53-1.04)      | 0.77 (0.55-1.08)         | 0.70 (0.49-1.02)         |
| 15-17                             | 0.83 (0.63-1.09)      | 0.84 (0.64-1.11)         | 0.84 (0.63-1.11)         |
| 18≥                               | Reference             | Reference                | Reference                |
| Fever (past 2 wk) <sup>c</sup>    |                       |                          |                          |
| ≤14                               | 0.76 (0.56-1.03)      | 0.84 (0.62-1.15)         | 0.71 (0.50-1.03)         |
| 15-17                             | 0.88 (0.64-1.21)      | 0.94 (0.68-1.31)         | 0.91 (0.63-1.30)         |
| 18≥                               | Reference             | Reference                | Reference                |
| Child mortality (<5y)             |                       |                          |                          |
| ≤14                               | 1.98 (1.10-3.56)      | 1.34 (0.83-2.19)         | 1.73 (0.91-3.29)         |
| 15-17                             | 1.52 (0.90-2.57)      | 1.75 (0.99-3.10)         | 1.11 (0.66-1.88)         |
| 18≥                               | Reference             | Reference                | Reference                |
| Infant mortality (<y)             |                       |                          |                          |
| ≤14                               | 1.94 (1.06-3.53)<br>* | 1.67 (0.94-2.96)         | 1.58 (0.82-3.06)         |
| 15-17                             | 1.48 (0.87-2.53)      | 1.27 (0.78-2.06)         | 0.99 (0.59-1.68)         |
| 18≥                               | Reference             | Reference                | Reference                |
| Neonatal mortality (<1 mo)        |                       |                          |                          |
| ≤14                               | 2.74 (1.57-4.80)*     | 2.33 (1.27-4.27)*        | 1.69 (0.73-3.92)         |
| 15-17                             | 2.16 (1.40-3.34)*     | 1.82 (1.16-2.86)*        | 1.07 (0.54-2.12)         |
| 18≥                               | Reference             | Reference                | Reference                |
| Small/very small infant           |                       |                          |                          |
| ≤14                               | 1.12 (0.87-1.45)      | 0.96 (0.74-1.23)         | 0.87 (0.68-1.11)         |
| 15-17                             | 0.92 (0.75-1.14)      | 0.83 (0.66-1.05)         | 0.96 (0.73-1.28)         |
| 18≥                               | Reference             | Reference                | Reference                |
| Low birth weight (<2500 g)        |                       |                          |                          |
| ≤14                               | 0.28 (0.12-0.68)*     | 0.31 (0.12-0.77)*        | 0.37 (0.12-1.13)         |
| 15-17                             | 0.69 (0.32-1.46)      | 0.70 (0.35-1.38)         | 0.59 (0.26-1.35)         |
| 18≥                               | Reference             | Reference                | Reference                |

\*P < .001.

<sup>a</sup> Adjusted odds ratio (AOR) for age of child (except for mortality indices), sex of child, multiparous birth, maternal age and education, place of residence, ethnicity, and wealth index.

<sup>b</sup> Adjusted odds ratio (AOR): Additionally adjusted for antenatal care.

<sup>c</sup> Sample restricted to living children under 5 years of age in the past 5 years (n = 8777).

Moreover, the recent conflict and transfer of power in Afghanistan have pushed more Afghan families to the brink of poverty. Additionally; the strict fanatic civil laws that have been recently imposed by the Taliban are an obvious violation of women's rights and facilitate forced child marriage in Afghan society, and could lead to irreparable health outcomes among young Afghan women. Therefore, global women's

rights advocacy and initiatives are necessary to mitigate the current situation and reduce the burden of early and forced marriage among Afghan girls.

Apart from the adverse maternal and reproductive outcomes of child marriage (Kamal & Hassan, 2015; Nasrullah et al., 2013), it has been documented that the neonate and child health could also be threatened by maternal early marriage; for instance, a study among the births in the past 5 years to ever-married Pakistani women aged 15-24 years observed higher child (<5 yrs) and infant (<1yr) mortality, as well as a higher prevalence of the diarrheal diseases in unadjusted models among the births to the women married at ages <18 years (Nasrullah et al., 2014). On the contrary; in our study, except for neonatal (<1mo) and infant (1<yr) mortality, other morbidity and mortality indices including the child mortality (<5yrs), recent diarrhea, ARI, and fever were not significantly different between the children born to women married as minors (<18) as compared to those born to women married as adults ( $\geq 18$  yrs). Similar findings were reported by a study among children under 5 born to women aged 15-24 years in India (Raj et al., 2010). Unlike our study findings, a higher rate of diarrheal diseases has been observed among the children born to women married as a child compared to those born to women married as an adult (Nasrullah et al., 2014; Raj et al., 2010). This has been attributed to the lower volume of breast milk that a physically immature mother could produce and possibly a lower concentration of colostrum which contains the necessary antibodies against infective microorganisms in early life (Lenders et al., 2000; Motil et al., 1997). It is also could be due to maternal nutrient depletion as a result of repeated pregnancies, particularly among poor and less educated young mothers, that higher morbidity and mortality are observed among the children born to the child mothers (Nasrullah et al., 2014). However, this association did not sustain after adjustment for social inequalities and the number of ANC visits. The association between neonatal and infant mortality with child marriage, which was observed in our study, also disappeared after adjustment for the number of ANC visits, this may implicate the lower number of ANC as the potential culprit for higher morbidity and mortality among the offspring of child brides. It is well known that inadequate ANC could lead to a higher incidence of adverse reproductive and maternal outcomes (Dadras, Dadras, et al., 2020; Dadras et al., 2021); and it is more likely for Afghan women married at ages <18 years, particularly those living in rural and

poor urban areas, to encounter limited access to maternity care due to lack of autonomy and inability of decision-making when it comes to negotiating their maternal and reproductive needs (Dadras & Nakayama, 2021). That being said, one may conclude that it is not only the physical immaturity of the young brides but also their inadequate access to maternity care that could cause higher morbidity and mortality among the children born to this underprivileged population. However, more in-depth longitudinal data are required to ascertain such an association, even though promoting the maternity care to enhance the access of the child brides, through women's rights advocacy and capacity building, could improve the access to the necessary antenatal care among this vulnerable population and reduce the adverse health outcomes in both young mother and offspring.

Another contradictory finding in our study was the lower likelihood of low birth weight among the births to the mothers married at ages  $\leq 14$  years in the extended age-at-marriage analysis; however, such finding was absent in comparing the births to women married at ages  $< 18$  with those born to women married at ages  $\geq 18$  years in both adjusted and unadjusted models. The findings across previous studies in similar settings such as Pakistan (Nasrullah et al., 2013), India (Raj et al., 2010), and Bangladesh (Hossain et al., 2022) were also inconsistent; nevertheless, none of them found such an unexpected finding indicating that child marriage is associated with a lower likelihood of low birth weight. Although we could not find any clear explanation for this bizarre finding, it may be due to the lower number of children that were born to women aged 15-24 years old who married at ages  $\leq 14$  [24 (6%) vs 80 (14%) in 15-17 age group and 103 (19%) in  $\geq 18$  group] or as a result of disproportionately higher numbers of missing values in some marital age groups. Nonetheless, this association disappeared after adjustment for the number of ANC visits which once again emphasizes the importance of ANC in optimal maternal and child health outcomes as being frequently described by the previous research (Dadras et al., 2021; Geist et al., 2006; Raatikainen et al., 2005). On the other hand,

### **Limitations**

Although this study offers valuable insights into child marriage prevalence and its association with morbidity and mortality among children under 5 years old in Afghanistan; some limitations should be

considered in the interpretation of the results. Since the majority of outcomes were self-reported, there is a risk of socially desirable response and recall bias. However, we restricted our analysis to the births of women aged 15-24 years to reduce the rate of recall bias by including the recent marriage and births rather than those of decades ago. Therefore, the findings are not representative of all the births in the past five years but merely of those born to the mother aged 15-24 years old. In addition, the results are specific to the young women in Afghanistan and are not generalizable to other settings and contexts.

Another limitation was the cross-sectional nature of the data that hinder the assumption of causality; however, as child marriage occurred before the outcomes included in this study, the ordering of this exposure relative to child health outcomes could stand correct. However, longitudinal data are necessary to precisely ascertain the effect that maternal age at marriage could have on neonatal and child health outcomes. Additionally, the large number of missing values for birth weight of the births to women aged 15-24 years (approximately 85% of cases), particularly for lower marital ages, could introduce unpredictable biases such as the lower rate of low birth weight among babies born to women married at ages  $\leq 14$  years that was observed in our study. However, including the values for size at birth with the higher response rate (98%) among the women aged 15-24 years who gave birth to at least a child in the past 5 years, increased the validity and reliability of the results.

## **Conclusion**

Almost two-thirds of women aged 15-24 years who gave birth to a child in the past 5 years married at ages  $< 18$ . The majority of these women resided in rural areas and were poor and illiterate. The children born in the last five years to the women married at ages  $< 18$  years were more likely to die in the first month. Additionally, those born to the women married at ages  $\leq 14$  years were more likely to die before their first birthday ( $< 1$  year). However, the association of neonatal and infant mortality with child marriage disappeared after adjustment for the number of ANC visits. Given the inadequate ANC among child brides in Afghanistan, mainly due to lack of autonomy and inability in decision-making to negotiate their reproductive rights (Dadras et al., 2022), this emphasizes the importance of adequate and timely maternity care to reduce child morbidity and mortality. Several social and gender-based inequalities such as

insufficient schooling, financial struggles, limited access to media, cultural and religious barriers, and male-dominant Afghan society harm the efforts toward women empowerment, particularly among child brides, and reduce the ability of this vulnerable population to negotiate their reproductive and maternity rights with their husbands/partners (Dadras & Nakayama, 2021; Dadras, Taghizade, et al., 2020) and this eventually lead to the higher newborn morbidity and mortality. Given the tragic turn of recent events in Afghanistan and the transfer of power to the Taliban, the obvious violation of young women's rights is nothing to be easily ignored. Hence, the international law and women's rights advocates should step in to rectify the violation of young Afghan women's rights and empower this vulnerable population; dictating appropriate interventions and policies to reduce the gender-based inequalities and consequent adverse health outcomes in both child mothers and offspring. Some solutions could be increasing the age of marriage by maintaining the adolescent girls at school, delaying childbirth by appropriate reproductive health education, and reducing socioeconomic and cultural vulnerabilities that may decrease cause-specific child morbidity and mortality in young adolescent mothers of Afghanistan. Nonetheless, further longitudinal research is necessary to ascertain the exact factors that influence child mortality and morbidity among child brides.

### **Abbreviations**

DHS: Demographic and Health Survey

EA: Enumeration area

CSO: Central Statistics Organization

LBW: Low birth weight

ANC: Antenatal care

Declarations

### **Availability of data and material**

The DHS questionnaire that collected the data in Afghanistan's demographic and health survey in 2015 could be downloaded from DHS official website (<https://www.dhsprogram.com>). The dataset (ADHS 2015) that was used in this study could be available upon a reasonable request and with permission from either the Walailak University ethical board or the DHS website.

### **Competing interests**

The authors have declared that no competing interests exist.

### **Funding**

The research was supported by Individual Research Grants (Grant Number WU-IRG-65-017) from Walailak University, Thailand. The funders had no role in study design, data collection and analysis, decision to publish, or preparation of the manuscript

### **Authors' contribution**

All authors have read and approved the manuscript. OD and MYD wrote the research protocol and contributed to the data analysis and writing the manuscript. TN, FD, and LJ provided critical feedback and comments on the data analysis and results and help in preparing the final draft. FD and LJ contributed to the data analysis and reporting of the results. TN, FD provided critical feedback on the manuscript.

### **Acknowledgment**

We also express our utmost gratitude to the staff at Walailak University, School of Public Health for technical and financial support of this project.

### **References**

- (ICRW), I. C. f. R. o. W. (2007). *How to End Child Marriage: Action Strategies for Prevention and Protection*.
- Abdullah, K., Malek, M. A., Faruque, A. S., Salam, M. A., & Ahmed, T. (2007, Mar). Health and nutritional status of children of adolescent mothers: experience from a diarrhoeal disease hospital in Bangladesh. *Acta Paediatr*, 96(3), 396-400. <https://doi.org/10.1111/j.1651-2227.2007.00117.x>
- Afghanistan, T. G. o. t. I. R. o. (2018). *Child Marriage in Afghanistan Changing the narrative*. moz-extension://da7a19ee-7ae4-4a3c-8b09-7b6903adb4ea/enhanced-reader.html?openApp&pdf=https%3A%2F%2Fwww.unicef.org%2Fafghanistan%2Fsites%2Funicef.org.afghanistan%2Ffiles%2F2018-07%2Fafg-report-Child%2520Marriage%2520in%2520Afghanistan.pdf
- Amin, S., Asadullah, M. N., Hossain, S., & Wahhaj, Z. (2017, 2017/03/04). Eradicating Child Marriage in the Commonwealth: Is Investment in Girls' Education Sufficient? *The Round Table*, 106(2), 221-223. <https://doi.org/10.1080/00358533.2017.1299461>
- Aychiluhm, S. B., Tesema, A. K., & Tadesse, A. W. (2021). Early Marriage and Its Determinants among Married Reproductive Age Group Women in Amhara Regional State, Ethiopia: A Multilevel Analysis. *Biomed Res Int*, 2021, 1969721. <https://doi.org/10.1155/2021/1969721>
- Clark, S., Bruce, J., & Dude, A. (2006, Jun). Protecting young women from HIV/AIDS: the case against child and adolescent marriage. *Int Fam Plan Perspect*, 32(2), 79-88. <https://doi.org/10.1363/3207906>
- Dadras, O., Dadras, F., Taghizade, Z., Seyedalinaghi, S., Ono-Kihara, M., Kihara, M., & Nakayama, T. (2020, 2020/07/28). Barriers and associated factors for adequate antenatal care among Afghan women in Iran; findings from a community-based survey. *BMC Pregnancy and Childbirth*, 20(1), 427. <https://doi.org/10.1186/s12884-020-03121-5>
- Dadras, O., & Nakayama, T. (2021). Child marriage and adverse reproductive outcomes among young Afghan women: implication for policy and practice in Afghanistan. *medRxiv*, 2021.2011.2020.21266626. <https://doi.org/10.1101/2021.11.20.21266626>

- Dadras, O., Nakayama, T., Kihara, M., Ono-Kihara, M., & Dadras, F. (2022, 2022/02/25). Intimate partner violence and unmet need for family planning in Afghan women: the implication for policy and practice. *Reproductive Health*, 19(1), 52. <https://doi.org/10.1186/s12978-022-01362-5>
- Dadras, O., Nakayama, T., Kihara, M., Ono-Kihara, M., Seyedalinaghi, S., & Dadras, F. (2021). The prevalence and associated factors of adverse pregnancy outcomes among Afghan women in Iran; Findings from community-based survey. *PLOS ONE*, 16(1), e0245007. <https://doi.org/10.1371/journal.pone.0245007>
- Dadras, O., Taghizade, Z., Dadras, F., Alizade, L., Seyedalinaghi, S., Ono-Kihara, M., Kihara, M., & Nakayama, T. (2020, 2020/05/06). "It is good, but I can't afford it ..." potential barriers to adequate prenatal care among Afghan women in Iran: a qualitative study in South Tehran. *BMC Pregnancy and Childbirth*, 20(1), 274. <https://doi.org/10.1186/s12884-020-02969-x>
- Dadras, O., & Chapman, R.S. (2017). Biomass Fuel Smoke and Stunting in Early Childhood: Finding from a National Survey Nepal. *Journal of Health Research*, 31, s7-s15.
- de Groot, R., Kuunyem, M. Y., & Palermo, T. (2018, Feb 26). Child marriage and associated outcomes in northern Ghana: a cross-sectional study. *BMC Public Health*, 18(1), 285. <https://doi.org/10.1186/s12889-018-5166-6>
- Geist, R. R., Beyth, Y., Shashar, D., Beller, U., & Samueloff, A. (2006, 2006/06/01/). Perinatal Outcome of Teenage Pregnancies in a Selected Group of Patients. *Journal of Pediatric and Adolescent Gynecology*, 19(3), 189-193. <https://doi.org/https://doi.org/10.1016/j.jpag.2006.02.005>
- Gortzak-Uzan, L., Hallak, M., Press, F., Katz, M., & Shoham-Vardi, I. (2001, Dec). Teenage pregnancy: risk factors for adverse perinatal outcome. *J Matern Fetal Med*, 10(6), 393-397. <https://doi.org/10.1080/714904371>
- Hossain, M. M., Abdulla, F., Banik, R., Yeasmin, S., & Rahman, A. (2022). Child marriage and its association with morbidity and mortality of under-5 years old children in Bangladesh. *PLOS ONE*, 17(2), e0262927. <https://doi.org/10.1371/journal.pone.0262927>
- International Council for Research on Women (ICRW). *New insights on preventing childmarriage: a global analysis of factors and program*. <http://www.icrw.org/files/publications/New-Insights-on-Preventing-Child-Marriage.pdf>
- Javed, R., & Mughal, M. (2021). Girls not brides: Evolution of child marriage in Pakistan. *Journal of Public Affairs*, 21(3), e2582. <https://doi.org/https://doi.org/10.1002/pa.2582>
- Kamal, S. M. M., & Hassan, C. H. (2015). Child Marriage and Its Association With Adverse Reproductive Outcomes for Women in Bangladesh. *Asia Pacific Journal of Public Health*, 27(2), NP1492-NP1506. <https://doi.org/10.1177/1010539513503868>
- Kenny, L., Koshin, H., Sulaiman, M., & Cislighi, B. (2019, Apr). Adolescent-led marriage in Somaliland and Puntland: A surprising interaction of agency and social norms. *J Adolesc*, 72, 101-111. <https://doi.org/10.1016/j.adolescence.2019.02.009>

- Kidman, R. (2016). Child marriage and intimate partner violence: a comparative study of 34 countries. *International Journal of Epidemiology*, 46(2), 662-675. <https://doi.org/10.1093/ije/dyw225>
- Kohno, A., Dahlui, M., Nik Farid, N. D., Ali, S. H., & Nakayama, T. (2019). In-depth examination of issues surrounding the reasons for child marriage in Kelantan, Malaysia: a qualitative study. *BMJ Open*, 9(9), e027377. <https://doi.org/10.1136/bmjopen-2018-027377>
- Kohno, A., Dahlui, M., Nik Farid, N. D., Safii, R., & Nakayama, T. (2020, 2020/03/04). Why girls get married early in Sarawak, Malaysia - an exploratory qualitative study. *BMC Women's Health*, 20(1), 46. <https://doi.org/10.1186/s12905-020-00911-z>
- Kohno, A., Techasrivichien, T., Suguimoto, S. P., Dahlui, M., Nik Farid, N. D., & Nakayama, T. (2020). Investigation of the key factors that influence the girls to enter into child marriage: A meta-synthesis of qualitative evidence. *PLOS ONE*, 15(7), e0235959. <https://doi.org/10.1371/journal.pone.0235959>
- Lenders, C. M., McElrath, T. F., & Scholl, T. O. (2000, Jun). Nutrition in adolescent pregnancy. *Curr Opin Pediatr*, 12(3), 291-296. <https://doi.org/10.1097/00008480-200006000-00021>
- Mathur, S., Greene, M., & Malhotra, A. (2003). *Too young to wed: The lives, rights and health of young married girls*.
- Motil, K. J., Kertz, B., & Thotathuchery, M. (1997, 1997/06/01/). Lactational performance of adolescent mothers shows preliminary differences from that of adult women. *Journal of Adolescent Health*, 20(6), 442-449. [https://doi.org/https://doi.org/10.1016/S1054-139X\(97\)00036-0](https://doi.org/https://doi.org/10.1016/S1054-139X(97)00036-0)
- Nasrullah, M., Zakar, R., & Krämer, A. (2013). Effect of Child Marriage on Use of Maternal Health Care Services in Pakistan. *Obstetrics & Gynecology*, 122(3), 517-524. <https://doi.org/10.1097/AOG.0b013e31829b5294>
- Nasrullah, M., Zakar, R., Zakar, M. Z., & Krämer, A. (2014, Mar). Girl-child marriage and its association with morbidity and mortality of children under 5 years of age in a nationally-representative sample of Pakistan. *J Pediatr*, 164(3), 639-646. <https://doi.org/10.1016/j.jpeds.2013.11.017>
- Nour, N. M. (2009, Winter). Child marriage: a silent health and human rights issue. *Rev Obstet Gynecol*, 2(1), 51-56.
- Olausson, P. O., Cnattingius, S., & Haglund, B. (1999, Feb). Teenage pregnancies and risk of late fetal death and infant mortality. *Br J Obstet Gynaecol*, 106(2), 116-121. <https://doi.org/10.1111/j.1471-0528.1999.tb08210.x>
- Raatikainen, K., Heiskanen, N., Verkasalo, P. K., & Heinonen, S. (2005). Good outcome of teenage pregnancies in high-quality maternity care. *European Journal of Public Health*, 16(2), 157-161. <https://doi.org/10.1093/eurpub/cki158>

- Raj, A., & Boehmer, U. (2013, 2013/04/01). Girl Child Marriage and Its Association With National Rates of HIV, Maternal Health, and Infant Mortality Across 97 Countries. *Violence Against Women*, 19(4), 536-551. <https://doi.org/10.1177/1077801213487747>
- Raj, A., Saggurti, N., Winter, M., Labonte, A., Decker, M. R., Balaiah, D., & Silverman, J. G. (2010). The effect of maternal child marriage on morbidity and mortality of children under 5 in India: cross sectional study of a nationally representative sample. *BMJ*, 340, b4258. <https://doi.org/10.1136/bmj.b4258>
- Santhya, K. G. (2011). Early marriage and sexual and reproductive health vulnerabilities of young women: a synthesis of recent evidence from developing countries. *Current Opinion in Obstetrics and Gynecology*, 23(5), 334-339. <https://doi.org/10.1097/GCO.0b013e32834a93d2>
- UNFPA. *Child Marriage*. <https://afghanistan.unfpa.org/en/node/15233>
- UNICEF. (2020). *Child marriage around the world: Infographic*. <https://www.unicef.org/stories/child-marriage-around-world>
- United Nations Children's Fund (UNICEF). (2005). *Early marriage: a harmful traditional practice*. [http://www.unicef.org/publications/files/Early\\_Marriage\\_12.lo.pdf](http://www.unicef.org/publications/files/Early_Marriage_12.lo.pdf).
